# Supplementary material for: Short-term outcomes of on- vs off-pump coronary artery bypass grafting in patients with left ventricular dysfunction: a systematic review and meta-analysis
Source: Springer Nature journal article supplement (doi:10.1186/s13019-020-01115-0), 2020-05-11
Supplement: MOESM1 [file 17971536]

### Search strategy

((((((((((((coronary artery bypass grafting[Title/Abstract]) OR coronary artery bypass surgery[Title/Abstract]) OR CABG[Title/Abstract]) OR on-pump[Title/Abstract]) OR conventional[Title/Abstract]) OR cardiopulmonary bypass[Title/Abstract])) OR "Coronary Artery Bypass"[Mesh])) AND (((off-pump[Title/Abstract]) OR cardioplegia[Title/Abstract]) OR OPCAB[Title/Abstract])) AND (((((((short term[Title/Abstract]) OR 30 day[Title/Abstract]) OR thirty day[Title/Abstract]) OR perioperative[Title/Abstract]) OR early[Title/Abstract]) OR operative[Title/Abstract]) OR postoperative[Title/Abstract]) OR in-hospital[Title/Abstract])) AND (((("Ventricular Dysfunction, Left"[Mesh]) OR ((poor left ventricle[Title/Abstract]) OR ("ejection fraction" [Title/Abstract] OR "EF"[Title/Abstract]) (ischemic cardiomyopathy[Title/Abstract])))) OR (((left ventricular[Title/Abstract]) OR LV[Title/Abstract])) AND (((dysynchrony[Title/Abstract]) OR dysfunction[Title/Abstract]) OR compromised[Title/Abstract]) OR depressed[Title/Abstract]))
