# Supplementary material for: Short-term outcomes of on- vs off-pump coronary artery bypass grafting in patients with left ventricular dysfunction: a systematic review and meta-analysis
Source: Springer Nature journal article supplement (doi:10.1186/s13019-020-01115-0), 2020-05-11

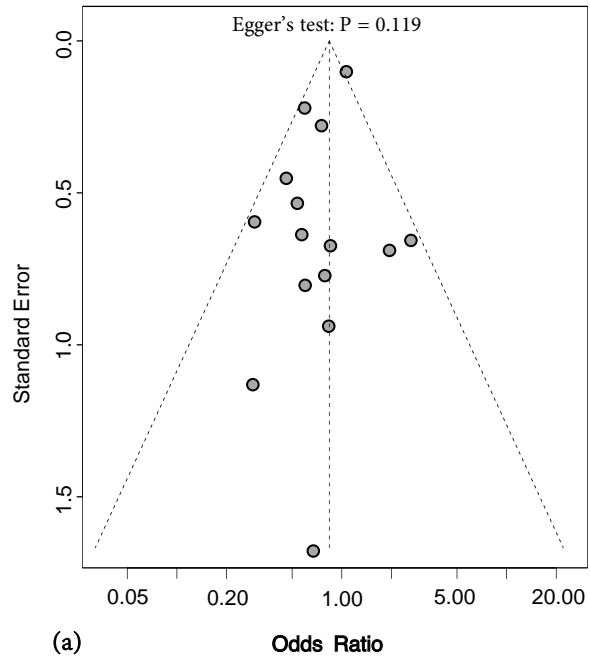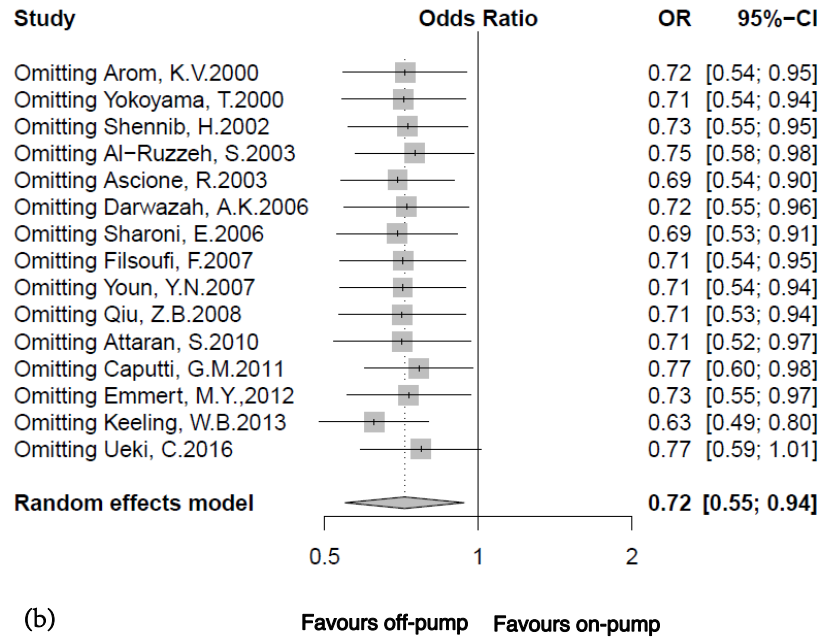

Supplement: MOESM2 [file 17971536]
